# Supplementary material for: Patterns of floristic inventory and plant collections in Myanmar
Source: PubMed Central journal article supplement — Plant Divers. 2023 Feb 4;45(3):302–8. doi: 10.1016/j.pld.2023.01.008 (PMC10311185; doi:10.1016/j.pld.2023.01.008), 2023-02-04

Table S1\_ Lists of websites

| No. | Data Source                                                       | Specification                                                                                             |
|-----|-------------------------------------------------------------------|-----------------------------------------------------------------------------------------------------------|
| 1   | Università degli Studi di Firenze<br>UniFI NATURAL HISTORY MUSEUM | <a href="https://fupress.com/">https://fupress.com/</a>                                                   |
| 2   | Herbarium Wu                                                      | <a href="https://herbarium.univie.ac.at/database/">https://herbarium.univie.ac.at/database/</a>           |
| 3   | Muséum national d'histoire naturelle                              | <a href="https://www.mnhn.fr/">https://www.mnhn.fr/</a>                                                   |
| 4   | Belgium Plantentuin Meise                                         | <a href="https://www.plantentuinmeise.be/nl/">https://www.plantentuinmeise.be/nl/</a>                     |
| 5   | Botanic Garden Meise Botanical Collection                         | <a href="https://www.botanicalcollections.be/#/en/home">https://www.botanicalcollections.be/#/en/home</a> |
| 6   | Smithsonia national museum of natural history                     | <a href="https://naturalhistory.si.edu/">https://naturalhistory.si.edu/</a>                               |
| 7   | Maturhistorisches museum wien                                     | <a href="https://www.nhm-wien.ac.at/">https://www.nhm-wien.ac.at/</a>                                     |
| 8   | Myanmar National Redlist                                          | <a href="https://www.forestdepartment.gov.mm/">https://www.forestdepartment.gov.mm/</a>                   |
| 9   | International Plant Name Index (IPNI)                             | <a href="https://www.ipni.org/">https://www.ipni.org/</a>                                                 |
| 10  | Pteridophyte Collections Consortium (PCC)                         | <a href="http://pteridoportal.org/portal/">http://pteridoportal.org/portal/</a>                           |
| 11  | Harvest university herbarium                                      | <a href="https://huh.harvard.edu/">https://huh.harvard.edu/</a>                                           |
| 12  | i Naturalist                                                      | <a href="https://www.inaturalist.org/">https://www.inaturalist.org/</a>                                   |
| 13  | Atlas of Living Australia Occurrence                              | <a href="https://www.ala.org.au/">https://www.ala.org.au/</a>                                             |
| 14  | IUCN 2020. The IUCN Red List of Threatened Species                | <a href="https://www.iucnredlist.org/">https://www.iucnredlist.org/</a>                                   |
| 15  | United Kingdom Natural History Museum London Data Portal          | <a href="https://data.nhm.ac.uk/">https://data.nhm.ac.uk/</a>                                             |
| 16  | Natural history museum data portal                                | <a href="https://www.nhm.ac.uk/">https://www.nhm.ac.uk/</a>                                               |

|    |                                                                  |                                                                                                                                                       |
|----|------------------------------------------------------------------|-------------------------------------------------------------------------------------------------------------------------------------------------------|
| 17 | Global Tree Search                                               | <a href="https://tools.bgci.org/global_tree_search.php">https://tools.bgci.org/global_tree_search.php</a>                                             |
| 18 | China National Knowledge Infrastructure (CNKI) and Research Gate | <a href="https://oversea.cnki.net/index/">https://oversea.cnki.net/index/</a>                                                                         |
| 19 | New York Botanical Garden                                        | <a href="https://www.nybg.org/">https://www.nybg.org/</a>                                                                                             |
| 20 | E-flora                                                          | <a href="http://www.efloras.org/index.aspx">http://www.efloras.org/index.aspx</a>                                                                     |
| 21 | Flora of Myanmar Database website                                | <a href="https://www.kahaku.go.jp/research/db/botany/myanmar/flora/index.php">https://www.kahaku.go.jp/research/db/botany/myanmar/flora/index.php</a> |
| 22 | World Checklist of Selected Plant Family (WCSP)                  | <a href="https://wcsp.science.kew.org/advsearch.do">https://wcsp.science.kew.org/advsearch.do</a>                                                     |
| 23 | Royal Botanic Garden Kew                                         | <a href="https://www.kew.org/">https://www.kew.org/</a>                                                                                               |
| 24 | Catalogue of life                                                | <a href="https://www.catalogueoflife.org/">https://www.catalogueoflife.org/</a>                                                                       |
| 25 | Encyclopedia of Life Smithsonian                                 | <a href="https://eol.org/">https://eol.org/</a>                                                                                                       |
| 26 | Institution, Myanmar Checklist Botanical                         | <a href="https://www.si.edu/">https://www.si.edu/</a>                                                                                                 |
| 27 | Information and Ecology Network (BIEN)                           | <a href="https://bien.nceas.ucsb.edu/bien/">https://bien.nceas.ucsb.edu/bien/</a>                                                                     |
| 28 | Plant of World Online                                            | <a href="http://www.plantsoftheworldonline.org/">http://www.plantsoftheworldonline.org/</a>                                                           |
| 29 | Tropicos                                                         | <a href="https://www.tropicos.org/home">https://www.tropicos.org/home</a>                                                                             |
| 30 | Royal Botanic Garden Edinburgh                                   | <a href="https://www.rbge.org.uk/">https://www.rbge.org.uk/</a>                                                                                       |
| 31 | Flora of China                                                   | <a href="http://flora.huh.harvard.edu/china/index.html">http://flora.huh.harvard.edu/china/index.html</a>                                             |

|    |                                                       |                                                                                         |
|----|-------------------------------------------------------|-----------------------------------------------------------------------------------------|
| 32 | Global Biodiversity<br>Information Facility<br>(GBIF) | <a href="https://www.gbif.org/">https://www.gbif.org/</a>                               |
| 33 | Biodiversity<br>Heritage Library                      | <a href="https://www.biodiversitylibrary.org/">https://www.biodiversitylibrary.org/</a> |

---

Table S2\_ Sample completeness values for each ecoregion

| <b>Ecoregions</b>                                          | <b>Area<br/>(km<sup>2</sup>)</b> | <b>Number of<br/>specimens</b> | <b>Sample<br/>Completeness</b> | <b>Sampling Density<br/>specimens/area(km<sup>2</sup>)</b> | <b>Sampling Density<br/>percentage</b> |
|------------------------------------------------------------|----------------------------------|--------------------------------|--------------------------------|------------------------------------------------------------|----------------------------------------|
| Chin Hills-Arakan Yoma Montane Forests                     | 29700                            | 6767                           | 0.9037                         | 0.227845118                                                | 10.52                                  |
| Eastern Himalayan Alpine Shrub and Meadows                 | 5264                             | 863                            | 0.7453                         | 0.162646061                                                | 7.51                                   |
| Irrawaddy Dry Forests                                      | 34987                            | 8369                           | 0.9477                         | 0.238582587                                                | 11.01                                  |
| Irrawaddy Freshwater Swamp Forests                         | 15085                            | 4838                           | 0.8996                         | 0.319867769                                                | 14.77                                  |
| Irrawaddy Moist Deciduous Forests                          | 137909                           | 26876                          | 0.9739                         | 0.194390198                                                | 8.97                                   |
| Kayah-Karen Montane Rain Forests                           | 54959                            | 1592                           | 0.8187                         | 0.028973374                                                | 1.33                                   |
| Mizoram-Manipur-Kachin Rain Forests                        | 70308                            | 4142                           | 0.8381                         | 0.058740941                                                | 2.71                                   |
| Myanmar Coast Mangroves                                    | 15827                            | 3958                           | 0.853                          | 0.248946475                                                | 11.49                                  |
| Myanmar Coastal Rain Forests                               | 65368                            | 7036                           | 0.8741                         | 0.107264273                                                | 4.95                                   |
| Northern Indochina Subtropical Forests                     | 136723                           | 16240                          | 0.9446                         | 0.118878559                                                | 5.48                                   |
| Northern Triangle Subtropical Forests                      | 53709                            | 6574                           | 0.8529                         | 0.122229659                                                | 5.64                                   |
| Northern Triangle Temperate Forests                        | 10677                            | 2122                           | 0.8149                         | 0.198689139                                                | 9.17                                   |
| Nujiang Langcang Gorge Alpine Conifer and<br>Mixed Forests | 4483                             | 444                            | 0.8638                         | 0.099529254                                                | 4.59                                   |
| Tenasserim-South Thailand Semi-Evergreen<br>Rain Forests   | 29973                            | 1163                           | 0.6262                         | 0.038822312                                                | 1.79                                   |

Table S3\_Multiple linear regression for explanatory variables with collection Density

| Explanatory variables            | Collection density |           |             |         |                |
|----------------------------------|--------------------|-----------|-------------|---------|----------------|
|                                  | Estimate           | t - value | P - value   | F value | R <sup>2</sup> |
| Human population density         | 1.59E+00           | 4.938     | < 2e-16 *** | 328.3   | 0.33           |
| Road proximity                   | 2.11E-02           | 5.596     | < 2e-16 *** | 129.6   | 0.16           |
| Elevational range                | -3.49E+00          | -8.767    | < 2e-16 *** | 281.9   | 0.31           |
| Size of Permanent Forest Estates | 2.21E+01           | 0.766     | 0.523       | 1.136   | 0.01           |

Table S4\_Comparing different species richness and records for each ecoregion

| ID | Ecoregions                                              | Species | Specimen records |
|----|---------------------------------------------------------|---------|------------------|
| 1  | Chin Hills-Arakan Yoma Montane Forests                  | 2006    | 6767             |
| 2  | Eastern Himalayan Alpine Shrub and Meadows              | 414     | 863              |
| 3  | Irrawaddy Dry Forests                                   | 1817    | 8369             |
| 4  | Irrawaddy Freshwater Swamp Forests                      | 1414    | 4838             |
| 5  | Irrawaddy Moist Deciduous Forests                       | 2799    | 26876            |
| 6  | Kayah-Karen Montane Rain Forests                        | 744     | 1592             |
| 7  | Mizoram-Manipur-Kachin Rain Forests                     | 1688    | 4142             |
| 8  | Myanmar Coast Mangroves                                 | 1351    | 3958             |
| 9  | Myanmar Coastal Rain Forests                            | 2260    | 7036             |
| 10 | Northern Indochina Subtropical Forests                  | 3312    | 16240            |
| 11 | Northern Triangle Subtropical Forests                   | 2454    | 6574             |
| 12 | Northern Triangle Temperate Forests                     | 821     | 2122             |
| 13 | Nujiang Langcang Gorge Alpine Conifer and Mixed Forests | 216     | 444              |
| 14 | Tenasserim-South Thailand Semi-Evergreen Rain Forests   | 671     | 1163             |

Fig.S1\_ Individual based rarefaction curves for 14 ecoregions. Rarefaction curves showing species diversity differences among ecoregion in Myanmar. (1) Chin Hills-Arakan Yoma Montane Forests (2) Eastern Himalayan Alpine Shrub and Meadows (3) Irrawaddy Dry Forests (4) Irrawaddy Freshwater Swamp Forests (5) Irrawaddy Moist Deciduous Forests (6) Kayah-Karen Montane Rain Forests (7) Mizoram-Manipur-Kachin Rain Forests (8) Myanmar Coast Mangroves (9) Myanmar Coastal Rain Forests (10) Northern Indochina Subtropical Forests (11) Northern Triangle Subtropical Forests (12) Northern Triangle Temperate Forests (13) Nujiang Langcang Gorge Alpine Conifer and Mixed Forests (14) Tenasserim-South Thailand Semi-Evergreen Rain Forests.

#### Rarefaction analyses

We used the rarefaction curves for two purposes. Firstly, to estimate how many species are really in each ecoregion, and how much sampling is needed to adequately survey the number of species within any given ecoregions. The second is to determine how extensively we have sampled the species in the ecoregions. Rarefaction curves have an asymptote.

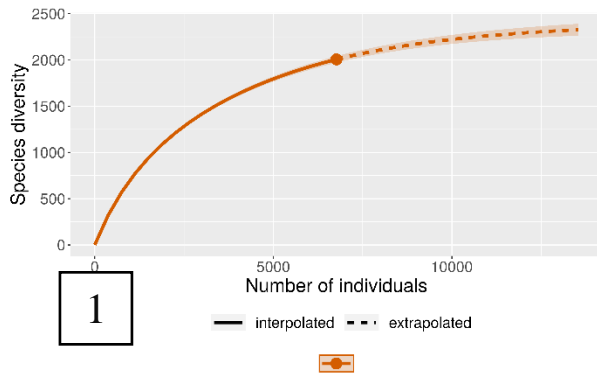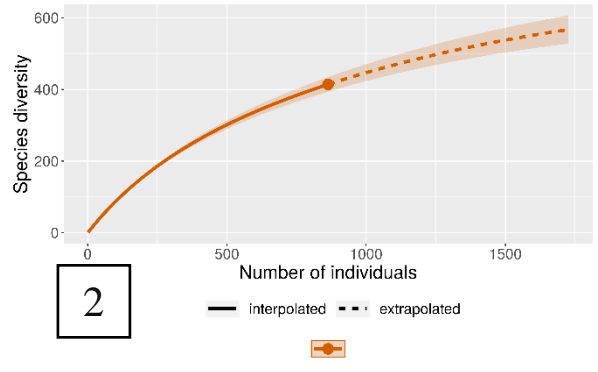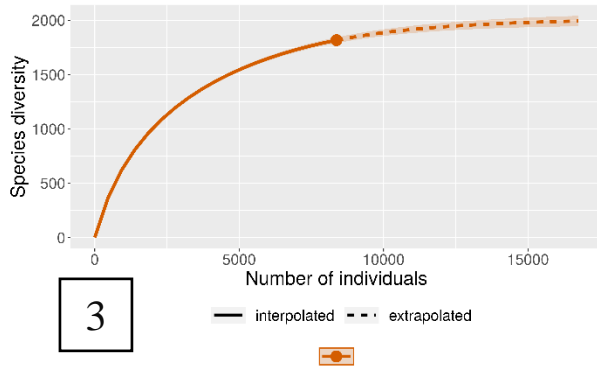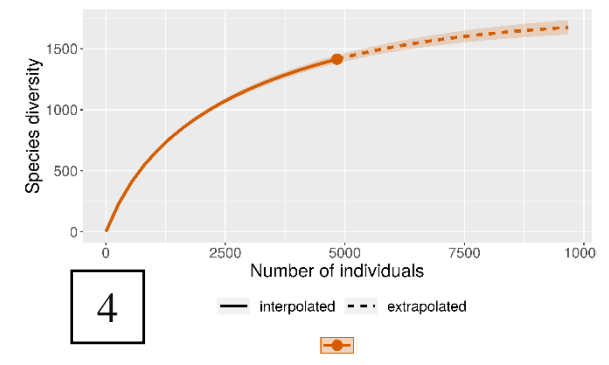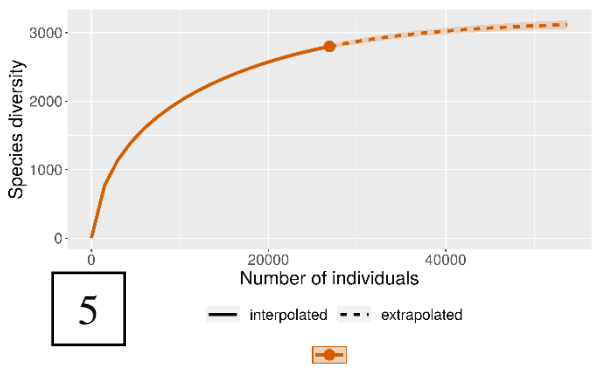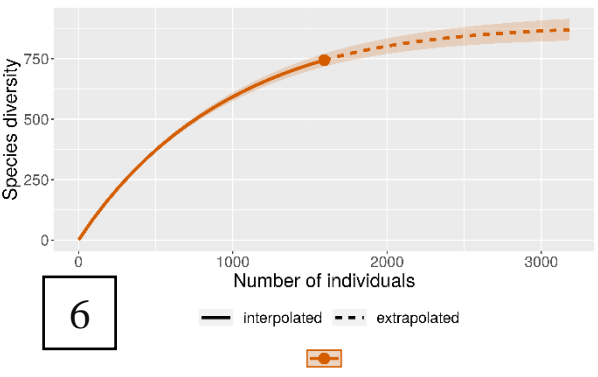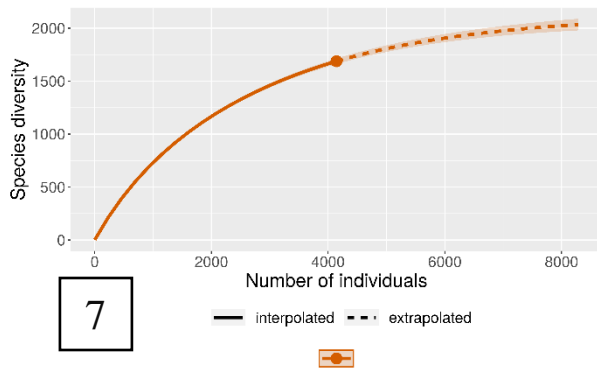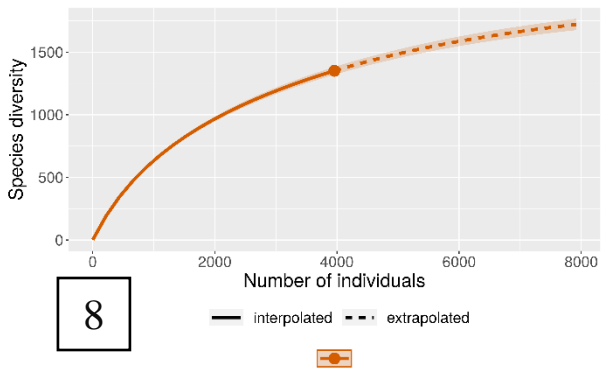

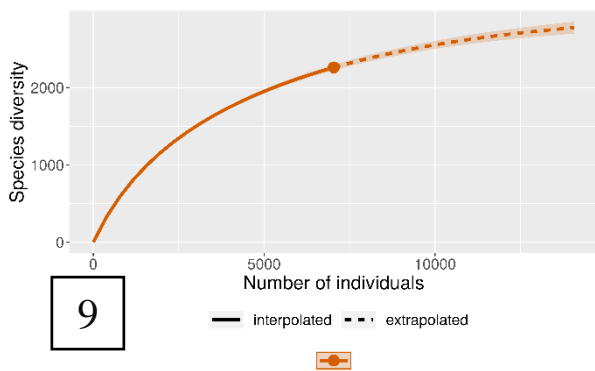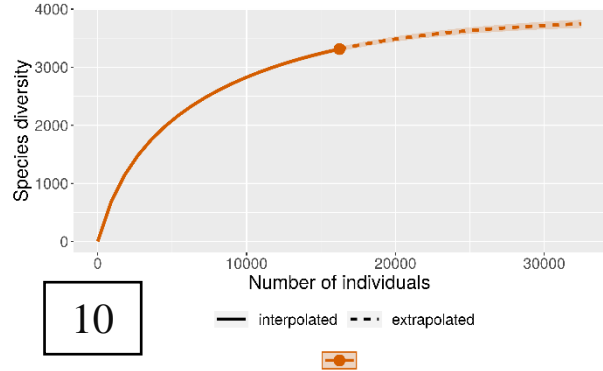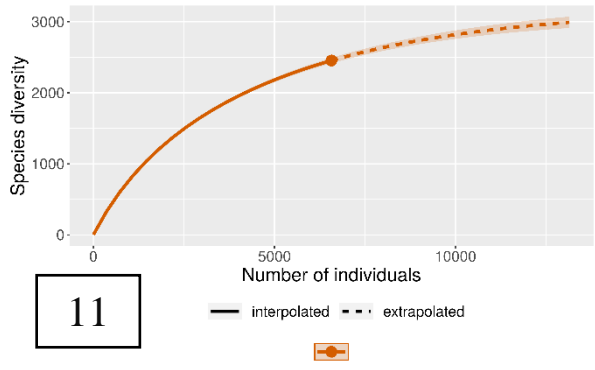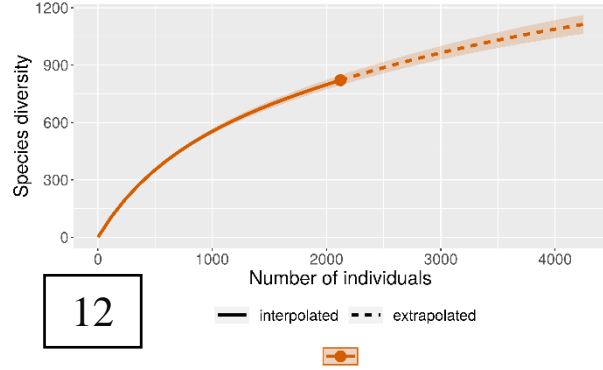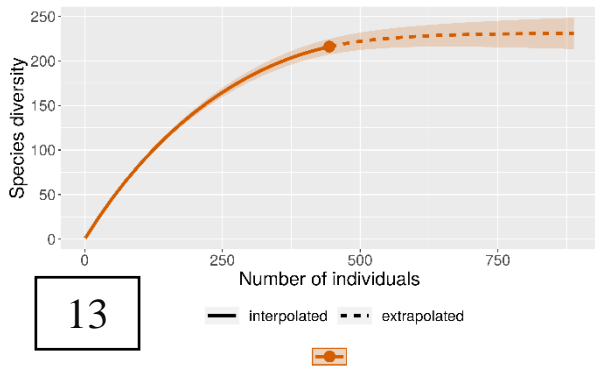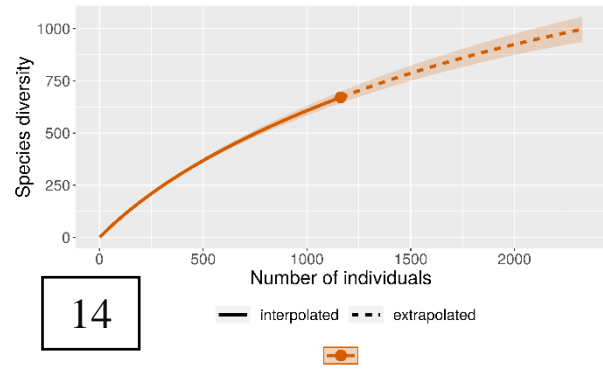

Fig.S2\_ Sample completeness curve for each ecoregion. (1) Chin Hills-Arakan Yoma Montane Forests (2) Eastern Himalayan Alpine Shrub and Meadows (3) Irrawaddy Dry Forests (4) Irrawaddy Freshwater Swamp Forests (5) Irrawaddy Moist Deciduous Forests (6) Kayah-Karen Montane Rain Forests (7) Mizoram-Manipur-Kachin Rain Forests (8) Myanmar Coast Mangroves (9) Myanmar Coastal Rain Forests (10) Northern Indochina Subtropical Forests (11) Northern Triangle Subtropical Forests (12) Northern Triangle Temperate Forests (13) Nujiang Langcang Gorge Alpine Conifer and Mixed Forests (14) Tenasserim-South Thailand Semi-Evergreen Rain Forests.

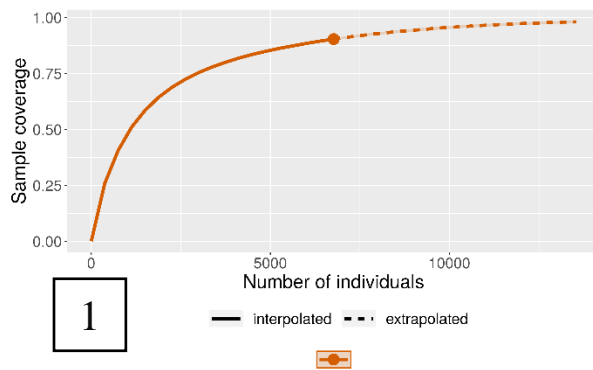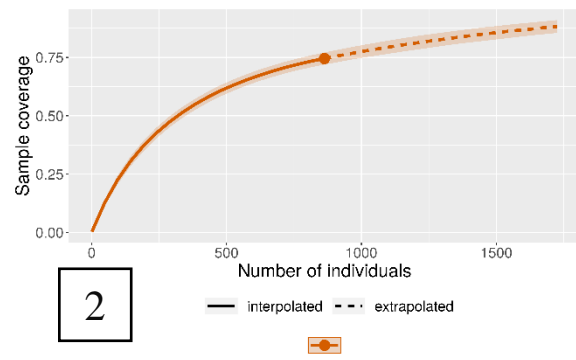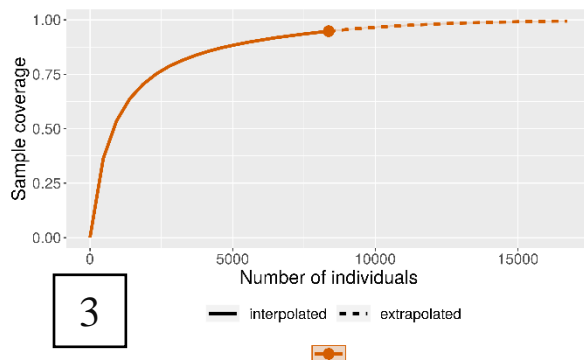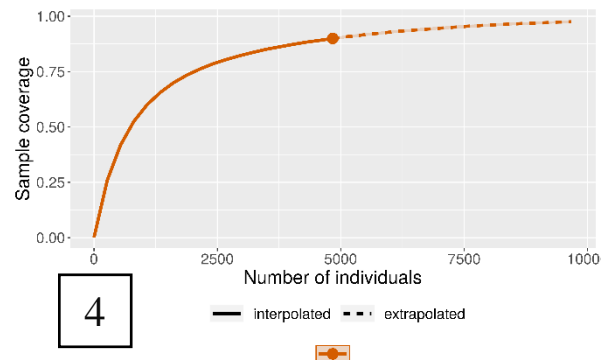



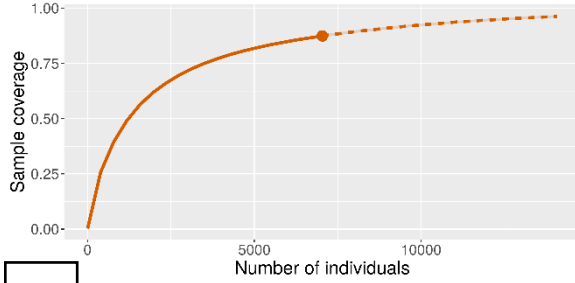

5

— interpolated - - - extrapolated

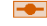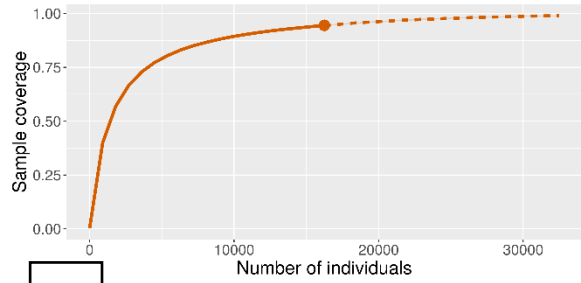

6

— interpolated - - - extrapolated

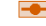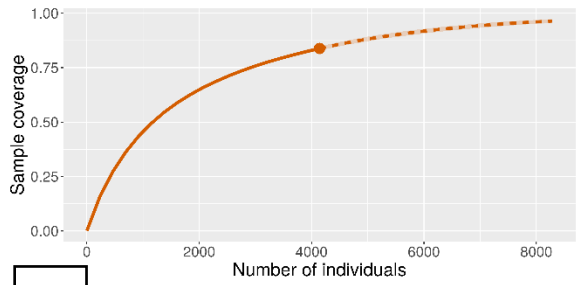

7

— interpolated - - - extrapolated

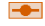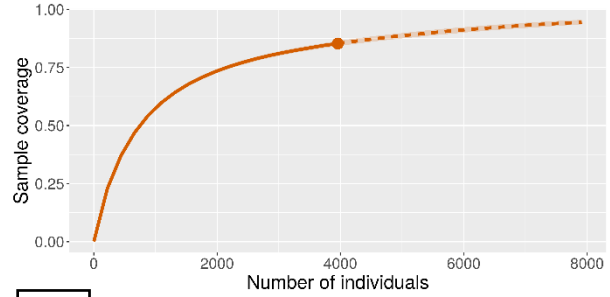

8

— interpolated - - - extrapolated

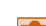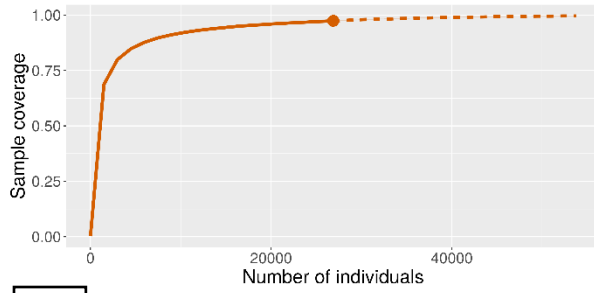

9

— interpolated - - - extrapolated

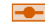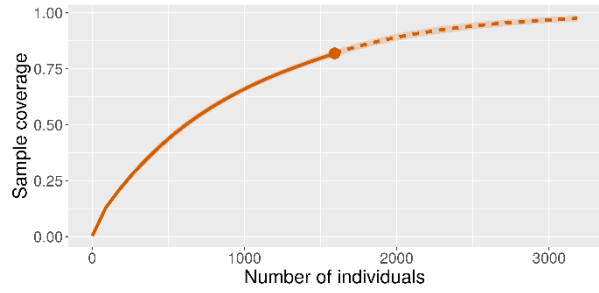

10

— interpolated - - - extrapolated

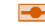

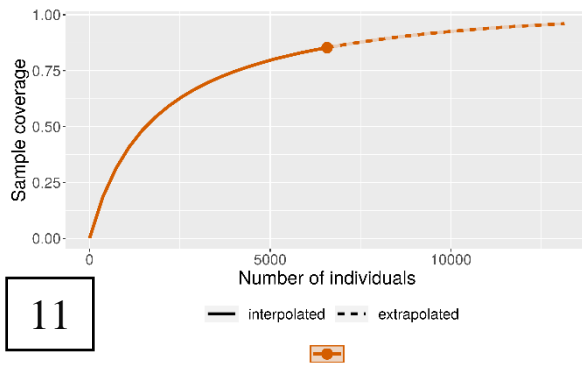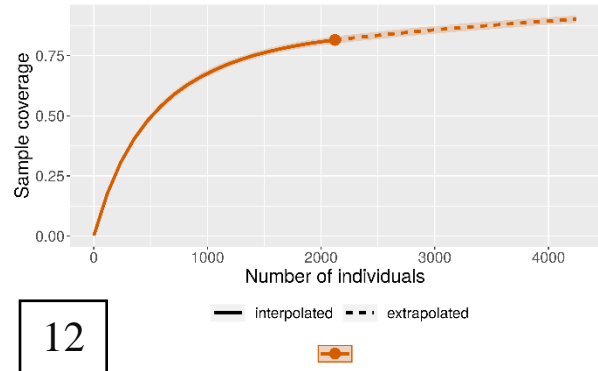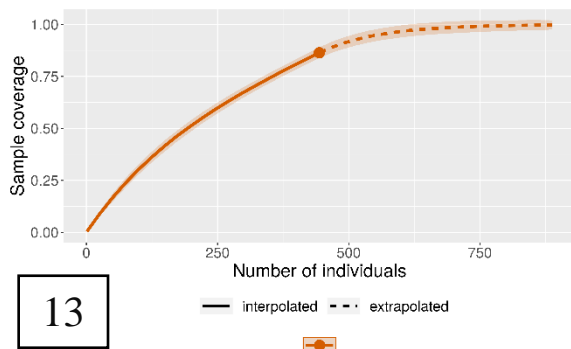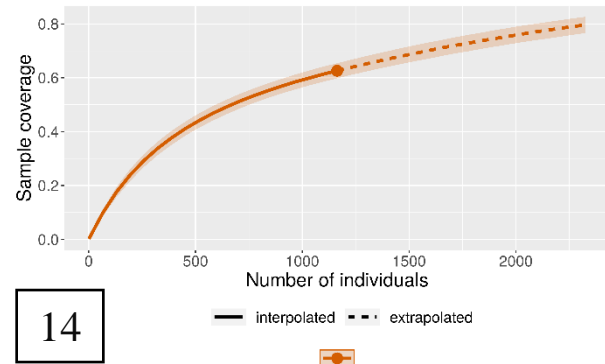

Fig.S3\_ Age of digitization and number of records per 30km<sup>2</sup> grid cell for (A) 1700-1800 (B) 1800-1900 (C) 1900-1950 (D) 1950-2000, (E) after2000 and (F) 1700-2020

The number of collections in each grid cell ranged from 0 to 2902 after the year 2000, from 0 to 2693 between the years 1950 and 2000, from 0 to 1024 between the years 1900 and 1950, from 0 to 289 between the years 1800 and 1900, and from 0 to 8 from the years 1700 to 1800. The total number of specimen records in each grid cell ranged from 0 to 3525. Moreover, no grid cell averages at least 1 specimen/ km<sup>2</sup> of land area.

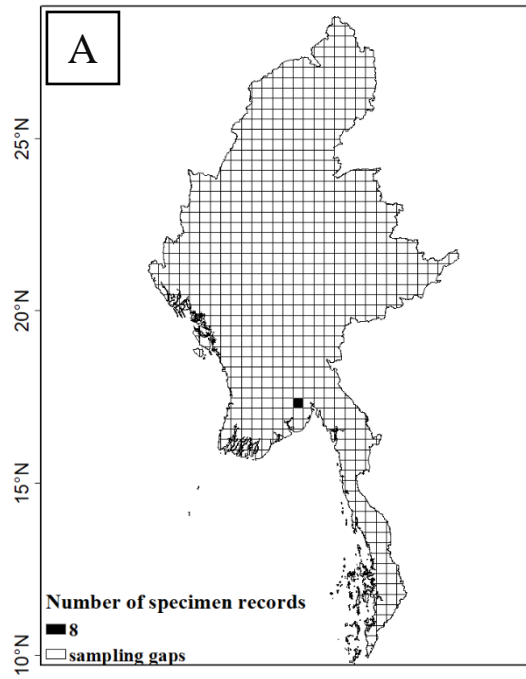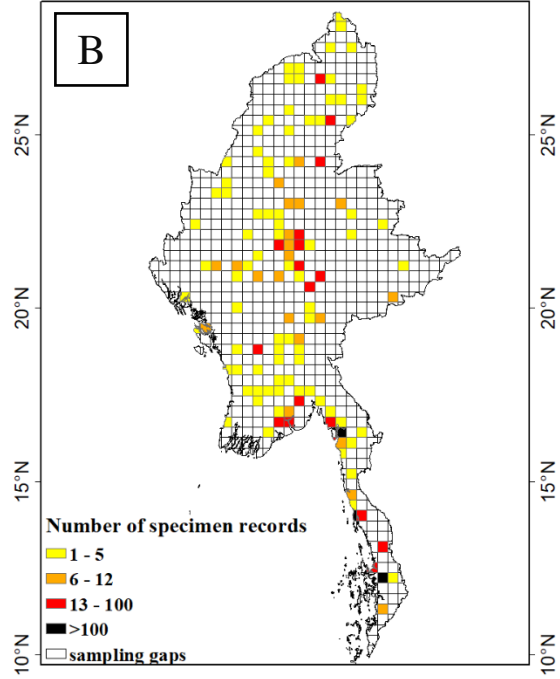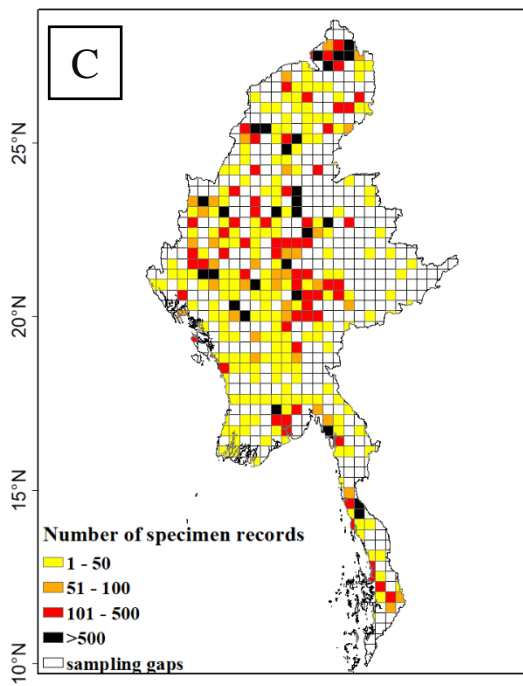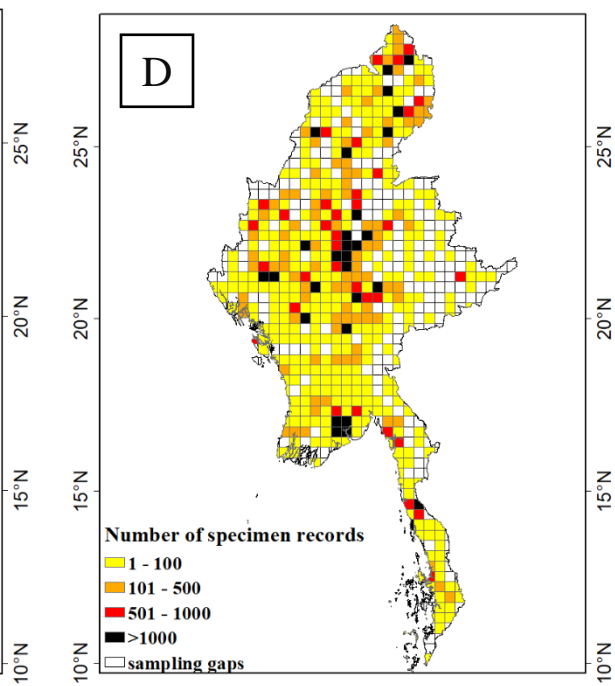

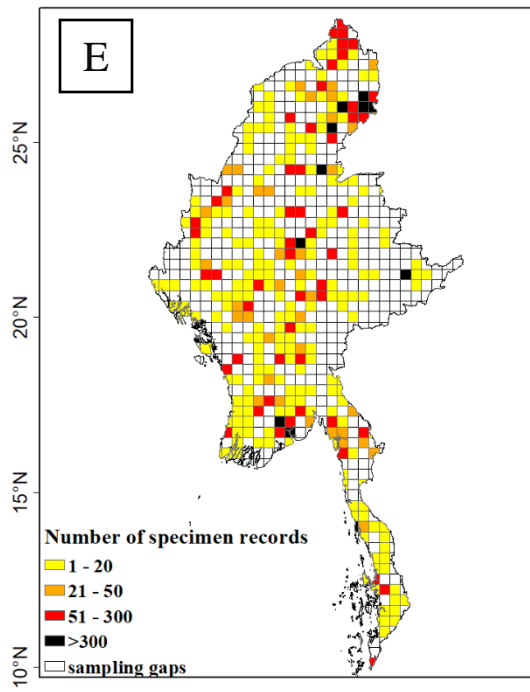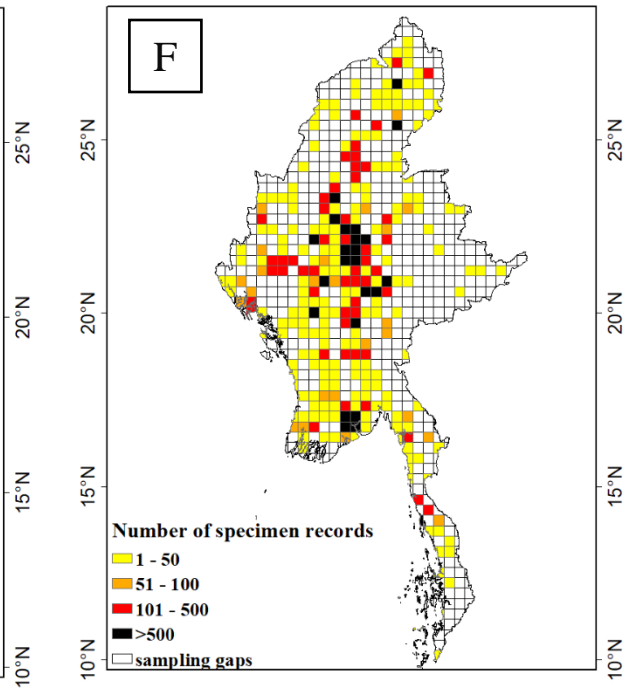

Fig.S4\_ The top five countries with the most species are solely documented in collections stored outside Myanmar

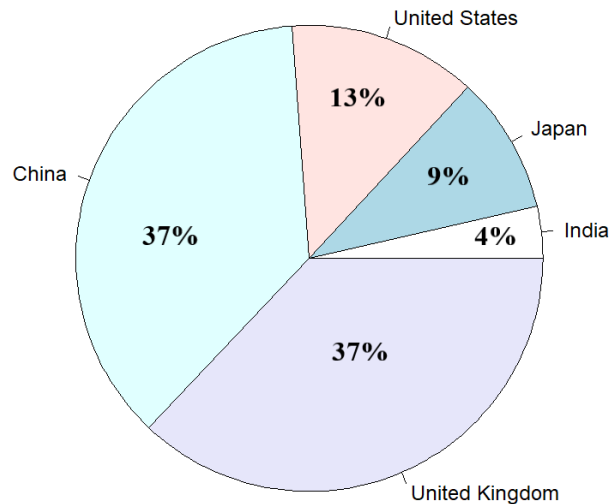

#### Floristic pattern at political unit level

A total of five families represents 26% of the flora of Myanmar: (1) Orchidaceae (1,206 species, 7.4%), (2) Leguminosae (1,016 species, 6.23%), (3) Poaceae (802 species, 4.92%), (4) Compositae (618 species, 3.79%), and (5) Rubiaceae (590 species, 3.62%). In the angiosperm group, the most important families in terms of the number of species are the Orchidaceae, Ericaceae, Rosaceae, Primulaceae, Leguminosae, Malvaceae, Lamiaceae, and Acanthaceae. The gymnosperms that dominate Myanmar are the Cupressaceae, Gnetaceae, Pinaceae, Podocarpaceae, and Taxaceae families. There are four dominant families of pteridophytes in Myanmar, namely Dryopteridaceae, Lycopodiaceae, Polypodiaceae, Davalliaceae, Pteridaceae and Schizaeaceae. The Bryaceae, Pottiaceae, Dicranaceae, and Sematophyllaceae families dominate the bryophytes group in Myanmar. The geographic distribution of Myanmar's native higher plant species is

uneven, with most of them concentrated in the northern regions. Based on the distribution of native higher plant species in different States and Regions, the geographical distribution can be categorized into five hierarchical levels. Level - 1 is made up of states and regions with plant species ranging from 4,003 to 5,417, including only Kachin State, which has a higher species diversity than other states and regions. Consequently, Kachin State has the most native higher plant species in Myanmar. Level - 2 includes Tanintharyi Region, Mandalay Region and Shan State, which have between 2,903 and 4,002 species. Level - 3 states and regions include Mon State, Yangon Region, Bago Region, Chin State and Sagaing Region, where the number of species varies between 1,315 and 2,902. There are 858 to 1,314 species present in Level 4, which includes the Magway Region. Level -5 includes states and regions with a number of species between 112 and 857, including the Ayeyarwady region, Kayin state, Rakhine state, Kayah state, and NayPyiTaw region. Township level geographic distribution was also analyzed. The results indicate that higher plant species are found in isolated areas in Myanmar's national parks, wildlife sanctuaries, and local mountain regions. At the township level, Mount Victoria Mountain, Pyin Oo Lwin National Garden, Inle Lake and Mount Popa, Hkakaborazi National Park, and Hponkanrazi Wildlife Sanctuary are the most biodiversity hotspots.

Fig.S5\_ Collection gap areas

#### COLLECTION GAP AREAS

In township level, 17 counties are still gap for specimen collection in my analysis. Namely, (1) Dedaye, (2) Kyaiklat, (3) Dagon Myothit (Seikkan), (4) Hpasawng, (5) Shadaw, (6) Kamma, (7) Munaung, (8) Poke Ba Thi Ri, (9) Myothit, (10) Mongpan, (11) Mongping, (12) Monghsu, (13) Mongyang, (14) Narphan, (15) Kunlong, (16) Konkyan, (17) Kyunhla. Therefore, we should focus in these township areas for much more botanical collections and explorations are needed to better understand the biodiversity of Myanmar.

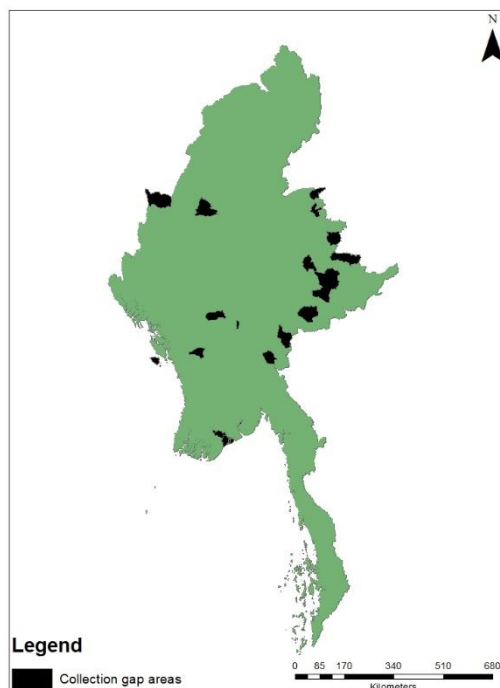

Fig.S6\_Latitudinal range sizes of species ranged limits

### Latitudinal range sizes of species ranged limits

Maximum and minimum latitudes of occurrence for angiosperm species range peaks were found 26°N and 12°N, especially in Northern Triangle Subtropical Forests and Tenasserim Semi-Evergreen Rain Forests. Gymnosperm species range northern limits peaked 26°N and Southern limits 21°N. High peaks were clear on Northern Triangle Subtropical Forests, Shan hills pine savanna and Shan warm temperate rainforest. Pteridophytes and bryophytes northern range limits peaked at 28°N and minimum range limits peaked at 21°N.

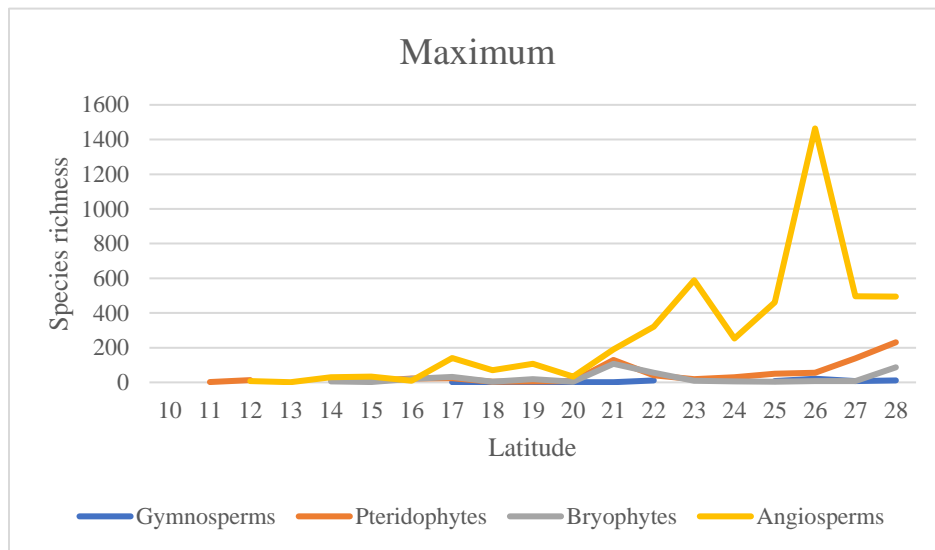



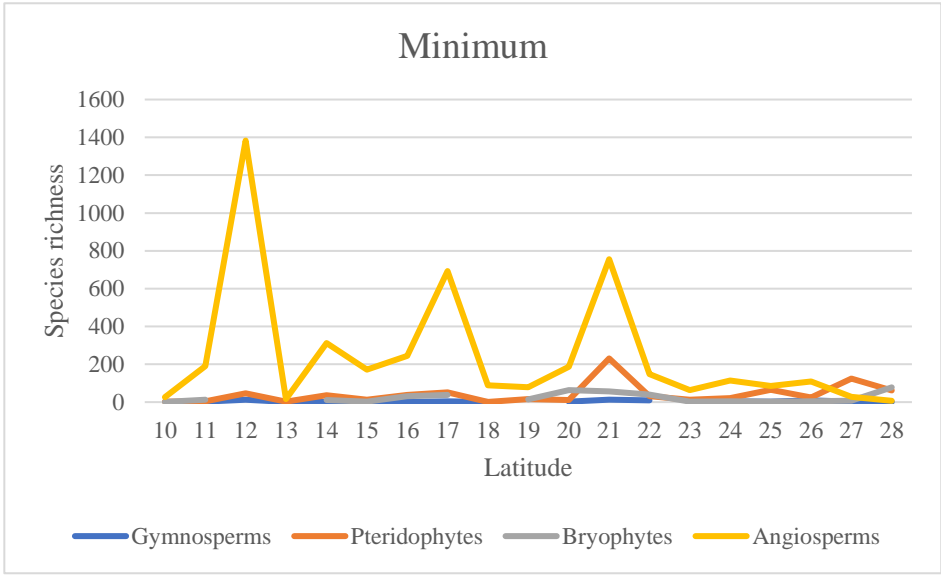



Fig.S8\_Geographic distribution of native plant species at states/regions and township level in Myanmar

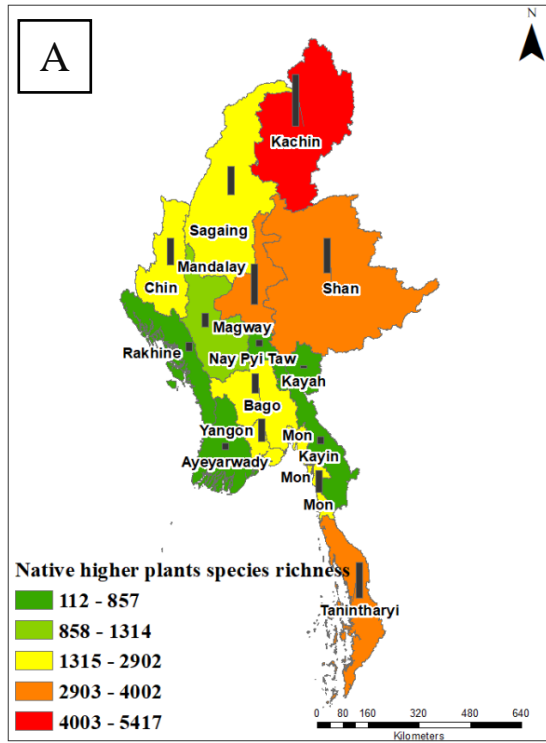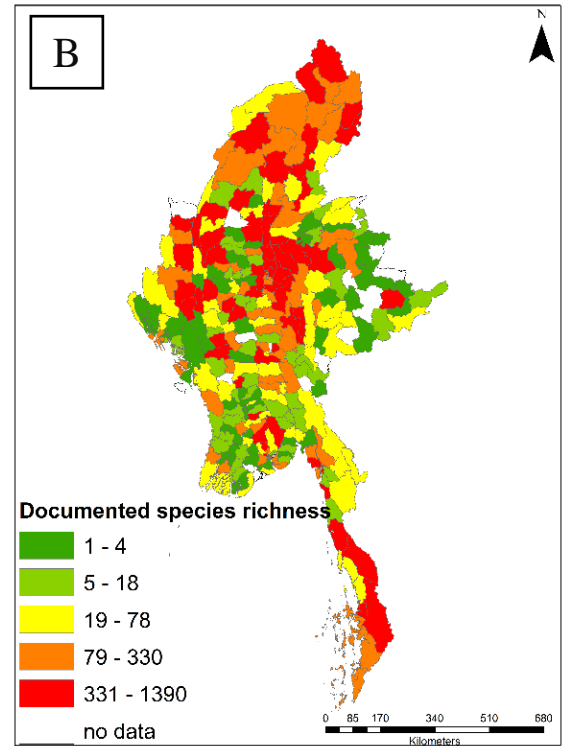

Supplement: mmc1.pdf [file mmc1.pdf]
